# Supplementary material for: Association between hematocrit in the first two hours of life and retinopathy during prematurity: a retrospective study from DRYAD
Source: Springer Nature journal article supplement (doi:10.1186/s12887-025-05533-8), 2025-03-08
Supplement: MOESM1 [file 12887_2025_5533_MOESM1_ESM.pdf]

Medical Research Ethics Committee of Affiliated  
Hospital of Jining Medical University  
Approval Document

|                                                                                                                                                                                                                                                                                                                           |                                                                                                                                    |                 |                                         |                                                   |             |                                         |
|---------------------------------------------------------------------------------------------------------------------------------------------------------------------------------------------------------------------------------------------------------------------------------------------------------------------------|------------------------------------------------------------------------------------------------------------------------------------|-----------------|-----------------------------------------|---------------------------------------------------|-------------|-----------------------------------------|
| Approval number                                                                                                                                                                                                                                                                                                           | 2024C134                                                                                                                           | Submission date | 2024.02.01                              |                                                   |             |                                         |
| Research name                                                                                                                                                                                                                                                                                                             | Association between Hematocrit in the First Two Hours of Life and Retinopathy during Prematurity: A Retrospective Study from DRYAD |                 |                                         |                                                   |             |                                         |
| Review files:<br>✧ Assignment for technical design<br>✧ Application form for waiving signed consent form<br>✧ Review application form<br>✧ Resume                                                                                                                                                                         |                                                                                                                                    |                 |                                         |                                                   |             |                                         |
| Statistics comment                                                                                                                                                                                                                                                                                                        | Voters                                                                                                                             | Approval        | Modification required prior to approval | Modification required and re-submitted for review | Disapproval | Terminate or suspend its prior approval |
|                                                                                                                                                                                                                                                                                                                           | 4                                                                                                                                  | 4               | 0                                       | 0                                                 | 0           | 0                                       |
| 1. Review recommendation:<br>None.                                                                                                                                                                                                                                                                                        |                                                                                                                                    |                 |                                         |                                                   |             |                                         |
| 2. Review decision:<br><input checked="" type="checkbox"/> Approval, <input type="checkbox"/> Modification required prior to approval, <input type="checkbox"/> Modification required and re-submitted for review, <input type="checkbox"/> Disapproval, <input type="checkbox"/> Terminate or suspend its prior approval |                                                                                                                                    |                 |                                         |                                                   |             |                                         |
| 3. Under continuous review:<br><input type="checkbox"/> Yes, every ____ month from the date of approval. <input checked="" type="checkbox"/> No.                                                                                                                                                                          |                                                                                                                                    |                 |                                         |                                                   |             |                                         |
| The ethics committee has the right to change the frequency of continuous review according to the actual situation.                                                                                                                                                                                                        |                                                                                                                                    |                 |                                         |                                                   |             |                                         |
| Medical Research Ethics Committee (seal)                                                                                                                                                                                                                                                                                  |                                                                                                                                    |                 |                                         |                                                   |             |                                         |
| Date: 2024.02.06                                                                                                                                                                                                                                                                                                          |                                                                                                                                    |                 |                                         |                                                   |             |                                         |
